# Supplementary material for: Home-based screening tools for amblyopia: a systematic review protocol
Source: HighWire-hosted journal article supplement (doi:10.1136/bmjopen-2021-051830), 2021-08-01
Supplement: bmjopen-2021-051830supp001_data_supplement.pdf [file bmjopen-2021-051830supp001_data_supplement.pdf]

## Appendices

### Appendix 1: Sample search strategy – MEDLINE

1. exp Amblyopia/ or amblyop\*.mp. or amblyog\*.mp.
2. ((assess\* or diagnos\* or detect\* or screen\* or test\*) adj4 (vision\* or visual\*)).mp.
3. exp visual acuity/
4. exp vision screening/ or screen\*.mp.
5. ((assess\* or diagnos\* or detect\* or screen\* or test\*) adj4 (communit\* or population\*)).mp.
6. ((assess\* or diagnos\* or detect\* or screen\* or test\*) adj4 program\*).mp.
7. 2 or 3 or 4 or 5 or 6
8. (home\* or internet\* or web\* or app\* or computer\* or smartphone\* or mobile\*).mp. or Mobile Applications/ or Smartphone Applications/
9. 1 and 7 and 8
10. limit 9 to "all child (0 to 18 years)"

## Appendix 2: Screening questionnaire

**Instructions for screeners:** Tick the appropriate box per screening question. If “no” at any stage, exclude. If “yes” or “unclear”, proceed to next stage; if “yes” at Stage 3, include. If “unclear” at Stage 3, contact study authors for further information and/or seek verdict from third arbitrator.

### Stage 1: Title Screening

1a) Does the study represent Level IV evidence or above, i.e. case series, cohort studies, case-control studies, randomised controlled trials (RCTs) and systematic reviews?

|         |  |
|---------|--|
| Yes     |  |
| No      |  |
| Unclear |  |

1b) Does the study involve home-based screening methods for amblyopia in children under 18 years of age?

|         |  |
|---------|--|
| Yes     |  |
| No      |  |
| Unclear |  |

### Stage 2: Abstract Screening

2a) Does the study represent Level IV evidence or above, i.e. case series, cohort studies, case-control studies, randomised controlled trials (RCTs) and systematic reviews?

|         |  |
|---------|--|
| Yes     |  |
| No      |  |
| Unclear |  |

2b) Does the study involve home-based screening methods for amblyopia in children under 18 years of age?

|         |  |
|---------|--|
| Yes     |  |
| No      |  |
| Unclear |  |

### Stage 3: Full text Screening

3a) Does the study represent Level IV evidence or above, i.e. case series, cohort studies, case-control studies, randomised controlled trials (RCTs) and systematic reviews?

|         |  |
|---------|--|
| Yes     |  |
| No      |  |
| Unclear |  |

3b) Does the study involve home-based screening methods for amblyopia in children under 18 years of age?

|         |  |
|---------|--|
| Yes     |  |
| No      |  |
| Unclear |  |

### Appendix 3: Data extraction tool, adapted from the Cochrane Collaboration

#### Methods

|                                          |  |
|------------------------------------------|--|
| Aim of study                             |  |
| Study design                             |  |
| Inclusion criteria                       |  |
| Exclusion criteria                       |  |
| Methods of recruitment                   |  |
| Methods of randomisation (if applicable) |  |
| Number of patients                       |  |

#### Specific to diagnostic accuracy studies

|                                                                |  |
|----------------------------------------------------------------|--|
| Personnel conducting index test                                |  |
| Personnel conducting gold standard test                        |  |
| Subjects receiving test                                        |  |
| Blinding (if applicable)                                       |  |
| Index test                                                     |  |
| Reference test                                                 |  |
| Personnel interpreting test results                            |  |
| Withdrawal rate/loss to follow up<br>If not specified state so |  |
| Sensitivity(including CI)                                      |  |
| Specificity(including CI)                                      |  |
| False positive                                                 |  |
| False negative                                                 |  |
| Correlation coefficient including p-values                     |  |

#### Specific to other evaluation studies

|                                                         |  |
|---------------------------------------------------------|--|
| Personnel conducting index test                         |  |
| Personnel conducting reference test                     |  |
| Subjects receiving test                                 |  |
| Blinding (if applicable)                                |  |
| Index test                                              |  |
| Reference test                                          |  |
| Personnel interpreting test results                     |  |
| Withdrawal rate/loss to follow up                       |  |
| Results reported (appropriate statistical<br>measures ) |  |
| Economic consideration/cost required                    |  |

**Appendix 4: QUADAS-2 tool****Domain 1: Patient selection**

|                                                                                                           |     |      |         |
|-----------------------------------------------------------------------------------------------------------|-----|------|---------|
| A. Risk of bias<br>Describe methods of patient selection:                                                 | Low | High | Unclear |
| Was a consecutive or random sample of patients enrolled?                                                  |     |      |         |
| Was a case-control design avoided?                                                                        |     |      |         |
| Did the study avoid inappropriate exclusions?                                                             |     |      |         |
| Could the selection of patients have introduced bias?                                                     |     |      |         |
| B. Concerns regarding applicability                                                                       | Low | High | Unclear |
| Is there concern that the included patients do not represent the actual spectrum of patients in practice? |     |      |         |

**Domain 2: Index test(s)**

|                                                                                                       |     |      |         |
|-------------------------------------------------------------------------------------------------------|-----|------|---------|
| Risk of bias<br>Describe the index test and how it is conducted and interpreted:                      | Low | High | Unclear |
| Were the index test results interpreted without knowledge of the results of the reference standard?   |     |      |         |
| If a threshold was used, was it pre-specified?                                                        |     |      |         |
| Was the index test described in sufficient detail to enable replication of the test?                  |     |      |         |
| Could the index test, its conduct, or its interpretation have introduced bias?                        |     |      |         |
| B. Concerns regarding applicability                                                                   | Low | High | Unclear |
| Is there concern that the index test, its conduct, or interpretation differ from the review question? |     |      |         |

**Domain 3: Reference standard**

| Risk of bias<br>Describe the index test and how is it conducted and interpreted:                                    | Low | High | Unclear |
|---------------------------------------------------------------------------------------------------------------------|-----|------|---------|
| Is the reference standard likely to correctly classify the target condition?                                        |     |      |         |
| Were the reference standard results interpreted without knowledge of the results of the index test?                 |     |      |         |
| Was the standard test described in sufficient detail to enable replication of the test?                             |     |      |         |
| Could the reference standard, its conduct, or its interpretation have introduced bias?                              |     |      |         |
| B. Concerns regarding applicability                                                                                 | Low | High | Unclear |
| Is there concern that the target condition as defined by the reference standard does not match the review question? |     |      |         |

## Domain 4: Flow and timing

| Risk of bias                                                                                                                                   | Low | High | Unclear |
|------------------------------------------------------------------------------------------------------------------------------------------------|-----|------|---------|
| Was there an appropriate interval between index test(s) and reference standard, so that the target condition did not change between two tests? |     |      |         |
| Did all patients receive a reference standard?                                                                                                 |     |      |         |
| Did all patients receive the same reference standard?                                                                                          |     |      |         |
| Were all patients included in the analysis?                                                                                                    |     |      |         |
| Could the patient flow have introduced bias?                                                                                                   |     |      |         |
